# Supplementary material for: Cross-Sectional Associations of 24-Hour Sedentary Time, Physical Activity, and Sleep Duration Compositions with Sleep Quality and Habits in Preschoolers
Source: PubMed Central journal article supplement (PMC7579350; doi:10.3390/ijerph17197148), 2020-09-29
Supplement: ijerph-17-07148-s001.pdf [file ijerph-17-07148-s001.pdf]

**Table S1.** Pair-wise log-ratio variation matrix of the 24-hour movement behaviors.

|       | <b>Sleep</b> | <b>ST</b> | <b>LPA</b> | <b>MVPA</b> |
|-------|--------------|-----------|------------|-------------|
| Sleep | 0            | 0.069     | 0.025      | 0.147       |
| ST    | 0.069        | 0         | 0.085      | 0.275       |
| LPA   | 0.025        | 0.085     | 0          | 0.122       |
| MVPA  | 0.147        | 0.275     | 0.122      | 0           |

Key: ST = stationary time; LPA = light physical activity, MVPA = moderate-to-vigorous physical activity.
